# Supplementary material for: Trends and Correlates of Overweight among Pre-School Age Children, Adolescent Girls, and Adult Women in South Asia: An Analysis of Data from Twelve National Surveys in Six Countries over Twenty Years
Source: Nutrients. 2019 Aug 14;11(8):1899. doi: 10.3390/nu11081899 (PMC6722576; doi:10.3390/nu11081899)
Supplement: Supplementary file 1 [file nutrients-11-01899-s001.pdf]

## SUPPLEMENTAL MATERIAL

**Supplemental Table 1.** Child weight-for-height z-score (WHZ) of children with mothers who are overweight versus those who are not; multiple years of surveys from Bangladesh, India and Nepal

|                     | Overweight mothers |          |      | Not overweight mothers |          |      | Adj. $\beta^2$ | SE   |
|---------------------|--------------------|----------|------|------------------------|----------|------|----------------|------|
|                     | n                  | mean WHZ | SD   | n                      | mean WHZ | SD   |                |      |
| <i>Bangladesh</i>   |                    |          |      |                        |          |      |                |      |
| <i>h</i>            |                    |          |      |                        |          |      |                |      |
| Pooled <sub>1</sub> | 1,832              | -0.56    | 1.2  | 14,109                 | -1       | 1.18 | 0.31**         | 0.03 |
| 1997                | 115                | -0.62    | 1.53 | 4,210                  | -0.98    | 1.33 | 0.15           | 0.13 |
| 2007                | 455                | -0.5     | 1.19 | 4,551                  | -1.08    | 1.07 | 0.42**         | 0.06 |
| 2014                | 1,262              | -0.57    | 1.17 | 5,348                  | -0.96    | 1.13 | 0.28**         | 0.04 |
| <i>India</i>        |                    |          |      |                        |          |      |                |      |
| Pooled              | 33,700             | -0.57    | 1.36 | 232,197                | -0.99    | 1.39 | 0.39**         | 0.04 |
| 1999                | 1,264              | -0.25    | 1.38 | 21,274                 | -0.81    | 1.47 | 0.34**         | 0.04 |
| 2006                | 3,721              | -0.46    | 1.3  | 33,931                 | -0.96    | 1.33 | 0.30**         | 0.02 |
| 2016                | 28,715             | -0.59    | 1.36 | 176,992                | -1.02    | 1.39 | 0.29**         | 0.01 |
| <i>Nepal</i>        |                    |          |      |                        |          |      |                |      |
| Pooled              | 627                | -0.2     | 1.11 | 9,701                  | -0.82    | 1.11 | 0.44**         | 0.05 |

\*p<0.05; \*\*p<0.01

<sup>1</sup>Each row represents a separate multivariate mixed linear regression model controlling for child's age and sex, mothers age and education, wealth index, urban, country-specific sub-regions and clusters

<sup>2</sup>Adjusted beta coefficient for maternal overweight

<sup>3</sup>Models were stratified by survey year when year was a significant effect modifier in the relationship

**Supplemental Table 2.** Relationship between prevalence of overweight<sup>1</sup> among adolescent girls and three key factors in Bangladesh, India and Nepal, presented pooled and stratified by survey year

|                   | N       | %<br>overweight | APR <sup>2</sup> | SE   |
|-------------------|---------|-----------------|------------------|------|
| <i>Bangladesh</i> |         |                 |                  |      |
| No education      | 487     | 1.85            | Ref.             |      |
| Some education    | 2944    | 5.81            | 0.99             | 0.37 |
| Poor              | 1346    | 2.23            | Ref.             |      |
| Not poor          | 2085    | 7.19            | 3.04**           | 0.7  |
| Rural             | 2506    | 3.95            | Ref.             |      |
| Urban             | 925     | 8.76            | 1.57*            | 0.3  |
| 1997              | 668     | 0.75            | Ref.             |      |
| 2007              | 1096    | 3.28            | 4.02**           | 1.92 |
| 2014              | 1667    | 8.34            | 12.52**          | 5.82 |
|                   | N       | %<br>overweight | APR <sup>2</sup> | SE   |
| <i>India</i>      |         |                 |                  |      |
| No education      | 13,766  | 1.93            | Ref.             |      |
| Some education    | 131,772 | 4.51            | 1.31**           | 0.09 |
| Poor              | 61,717  | 2.02            | Ref.             |      |
| Not poor          | 83,822  | 5.93            | 2.29**           | 0.09 |
| Rural             | 103,672 | 3.1             | Ref.             |      |
| Urban             | 41,867  | 7.17            | 1.89**           | 0.06 |
| 1999              | 5119    | 1.8             | Ref.             |      |
| 2006              | 21818   | 3.78            | 1.37             | 0.16 |
| 2016              | 118602  | 4.46            | 2.26             | 0.26 |
|                   | N       | %<br>overweight | APR <sup>2</sup> | SE   |
| <i>Nepal</i>      |         |                 |                  |      |
| No education      | 493     | 1.62            | Ref.             |      |
| Some education    | 3,040   | 3.88            | 1.67             | 0.76 |
| Poor              | 1,437   | 2.3             | Ref.             |      |
| Not poor          | 2,096   | 4.44            | 1.76*            | 0.42 |
| Rural             | 2,119   | 2.74            | Ref.             |      |
| Urban             | 1,414   | 4.81            | 1.4              | 0.3  |

|      |       |      |      |      |
|------|-------|------|------|------|
| 1996 |       |      | 4    | --   |
| 2006 | 2282  | 3.11 | Ref. |      |
| 2016 | 1,251 | 4.4  | 1.51 | 0.32 |

\*p<0.05; \*\*p<0.01

<sup>1</sup>Overweight is defined as a body mass index  $\geq 25.0$  kg/m<sup>2</sup> based on the IOTF sex and age-adjusted values

<sup>2</sup>Each adjusted prevalence ratio represents a separate modified Poisson model controlling for the over factors listed in the table, woman's age, country-specific sub-region and cluster

<sup>3</sup>Model was stratified by survey year when survey year was a significant (p<0.1) effect modifier of the relationship

<sup>4</sup>No adolescent girls were overweight in this survey

**Supplemental table 3.** Rate of change<sup>1</sup> in child weight-for-height z-score (WHZ) and prevalence of overweight, and adolescent and women body mass index (BMI), prevalence of overweight and prevalence of obese in Bangladesh, India and Nepal across survey years

|                                        | Bangladesh |       |       | India |       |       | Nepal |       |        |
|----------------------------------------|------------|-------|-------|-------|-------|-------|-------|-------|--------|
|                                        | 1997       | 2007  | 2014  | 1999  | 2006  | 2016  | 1996  | 2006  | 2016   |
| <b>Children</b>                        |            |       |       |       |       |       |       |       |        |
| Mean WHZ                               | -0.99      | -1.04 | -0.88 | -0.88 | -1.01 | -1.02 | -0.8  | -0.84 | -0.65  |
| Rate of change                         |            | 0     | -0.02 |       | 0.02  | 0.001 |       | 0     | -0.025 |
| Prevalence overweight (%)              | 1.9        | 1     | 1.5   | 2.9   | 1.6   | 2.1   | 1     | 0.6   | 1.3    |
| Rate of change                         |            | -0.06 | 0.06  |       | -0.07 | 0.03  |       | -0.05 | 0.08   |
| <b>Adolescent girls</b>                |            |       |       |       |       |       |       |       |        |
| Mean BMI (kg/m <sup>2</sup> )          | 18.6       | 19.6  | 20.2  | 19.1  | 19    | 19.4  | 19.6  | 19.9  | 20     |
| Rate of change                         |            | 0.01  | 0     |       | 0     | 0.002 |       | 0     | 0.001  |
| Prevalence overweight <sup>2</sup> (%) | 0.7        | 3.2   | 8.2   | 1.6   | 2.7   | 4.9   | 0     | 3     | 4.4    |
| Rate of change                         |            | 0.16  | 0.14  |       | 0.07  | 0.06  |       | 3     | 0.04   |
| Prevalence obese <sup>4</sup> (%)      | 0.7        | 0.1   | 1.3   | 0.1   | 0.3   | 0.9   | 0     | 0.1   | 0.4    |
| Rate of change                         |            | -0.18 | 0.44  |       | 0.15  | 0.12  |       | 3     | 0.15   |
| <b>Women</b>                           |            |       |       |       |       |       |       |       |        |
| Mean BMI (kg/m <sup>2</sup> )          | 18.9       | 20.8  | 22.5  | 20.4  | 20.8  | 22.4  | 19.8  | 20.8  | 22.7   |
| Rate of change                         |            | 0.01  | 0.01  |       | 0     | 0.007 |       | 0     | 0.009  |
| Prevalence overweight <sup>5</sup> (%) | 3.2        | 12.9  | 25.6  | 11.4  | 15.1  | 24.1  | 1.9   | 10.4  | 26.8   |
| Rate of change                         |            | 0.15  | 0.1   |       | 0.04  | 0.05  |       | 0.19  | 0.1    |
| Prevalence obese <sup>6</sup> (%)      | 0.6        | 1.9   | 4.7   | 2.4   | 3.5   | 6.04  | 0.1   | 1.2   | 6.26   |

| Rate of change | 0.12 | 0.14 | 0.05 | 0.06 | 0.28 | 0.18 |
|----------------|------|------|------|------|------|------|
|----------------|------|------|------|------|------|------|

<sup>1</sup>Rate of change since previous time point

<sup>2</sup>Overweight among adolescents is defined as a body mass index  $\geq 25.0$  kg/m<sup>2</sup> based on the IOTF sex and age-adjusted values

<sup>3</sup>Could not be calculated as the prevalence at the previous time point was 0

<sup>4</sup>Obese among adolescents is defined as a body mass index  $\geq 30.0$  kg/m<sup>2</sup> based on the IOTF sex and age-adjusted values

<sup>5</sup>Overweight among women is defined as a body mass index  $\geq 25.0$  kg/m<sup>2</sup>

<sup>6</sup>Obese among women is defined as a body mass index  $\geq 30.0$  kg/m<sup>2</sup>

**Supplemental Table 4.** Relationship between prevalence of overweight<sup>1</sup> among adult women and three key factors in Bangladesh, India and Nepal, presented pooled and stratified by survey year

|                   | Pooled |                     |                  |      | Stratified by survey year <sup>3</sup> |                     |                  |      |       |                         |                  |      |        |                         |                  |      |
|-------------------|--------|---------------------|------------------|------|----------------------------------------|---------------------|------------------|------|-------|-------------------------|------------------|------|--------|-------------------------|------------------|------|
|                   | N      | %<br>overwei<br>ght | APR <sup>2</sup> | SE   | 1996                                   |                     |                  |      | 2007  |                         |                  |      | 2014   |                         |                  |      |
|                   |        |                     |                  |      | N                                      | %<br>overw<br>eight | APR <sub>2</sub> | SE   | N     | %<br>over<br>weig<br>ht | APR <sup>2</sup> | SE   | N      | %<br>over<br>weig<br>ht | APR <sub>2</sub> | SE   |
| <i>Bangladesh</i> |        |                     |                  |      |                                        |                     |                  |      |       |                         |                  |      |        |                         |                  |      |
| No education      | 9,029  | 10.31               | Ref.             |      | 1,859                                  | 1.29                | Ref.             |      | 3,214 | 7.28                    | Ref.             |      | 3,956  | 17.01                   | Ref.             |      |
| Some education    | 18,336 | 24.45               | 1.74**           | 0.06 | 1,518                                  | 5.8                 | 2.91*<br>*       | 0.62 | 5,817 | 19.29                   | 2.08**           | 0.16 | 11,001 | 29.76                   | 1.56*<br>*       | 0.06 |
| Poor              | 9,911  | 8                   | Ref.             |      | 1,405                                  | 0.71                | Ref.             |      | 3,056 | 4.02                    | Ref.             |      | 5,450  | 12.11                   | Ref.             |      |
| Not poor          | 17,454 | 26.48               | 2.24**           | 0.09 | 1,972                                  | 5.17                | 3.41*<br>*       | 1.05 | 5,975 | 20.64                   | 2.90**           | 0.29 | 9,507  | 34.57                   | 1.49*<br>*       | 0.05 |
| Rural             | 18,098 | 13.64               | ref.             |      | 2,881                                  | 2.05                | ref.             |      | 5,503 | 8.54                    | ref.             |      | 9,714  | 19.96                   | ref.             |      |
| Urban             | 9,267  | 31.8                | 1.67**           | 0.05 | 496                                    | 10.69               | 3.29*<br>*       | 0.66 | 3,528 | 25.11                   | 2.04**           | 0.14 | 5,243  | 38.3                    | 1.49*<br>*       | 0.05 |
| 1997              | 3,377  | 3.32                | ref.             |      |                                        |                     |                  |      |       |                         |                  |      |        |                         |                  |      |
| 2007              | 9,031  | 15.01               | 2.91**           | 0.32 |                                        |                     |                  |      |       |                         |                  |      |        |                         |                  |      |
| 2014              | 14,957 | 26.39               | 5.35**           | 0.58 |                                        |                     |                  |      |       |                         |                  |      |        |                         |                  |      |
|                   | Pooled |                     |                  |      | Stratified by survey year <sup>3</sup> |                     |                  |      |       |                         |                  |      |        |                         |                  |      |
|                   | N      | %<br>overwei        | APR <sup>2</sup> | SE   | 1999                                   |                     |                  |      | 2006  |                         |                  |      | 2016   |                         |                  |      |
|                   |        |                     |                  |      | N                                      | %<br>overw          | APR <sub>2</sub> | SE   | N     | %<br>over               | APR <sup>2</sup> | SE   | N      | %<br>over               | APR <sub>2</sub> | SE   |



|          |        |       |        |      |       |      |            |      |       |       |        |      |       |       |           |
|----------|--------|-------|--------|------|-------|------|------------|------|-------|-------|--------|------|-------|-------|-----------|
| Not poor | 9,299  | 17.26 | 2.03** | 0.13 |       |      |            |      |       |       |        |      |       |       |           |
| Rural    | 10,113 | 7.09  | ref.   |      | 2,718 | 1.62 | ref.       |      | 5,648 | 6.41  | ref.   |      | 1,747 | 17.8  | ref.      |
| Urban    | 5,607  | 22.61 | 1.51** | 0.11 | 254   | 7.09 | 2.80*<br>* | 0.82 | 2,186 | 17.66 | 1.94** | 0.21 | 3,167 | 27.28 | 1.11 0.08 |
| 1996     | 2,972  | 2.09  | ref.   |      |       |      |            |      |       |       |        |      |       |       |           |
| 2006     | 7,834  | 9.55  | 2.36** | 0.35 |       |      |            |      |       |       |        |      |       |       |           |
| 2016     | 4,914  | 23.91 | 6.05** | 0.95 |       |      |            |      |       |       |        |      |       |       |           |

\*p<0.05; \*\*p<0.01

<sup>1</sup>Overweight is defined as a body mass index  $\geq 25.0$  kg/m<sup>2</sup>

<sup>2</sup>Each adjusted prevalence ratio (APR) represents a separate modified Poisson model controlling for the over factors listed in the table, woman's age, country-specific sub-region and cluster

<sup>3</sup>Model was stratified by survey year when survey year was a significant (p<0.1) effect modifier of the relationship
